# Supplementary material for: Herpes Zoster and Long‐Term Risk of Cardiovascular Disease
Source: PubMed Central journal article supplement — J Am Heart Assoc. 2022 Dec 6;11(23):e027451. doi: 10.1161/JAHA.122.027451 (PMC9851464; doi:10.1161/jaha.122.027451), 2022-12-06
Supplement: JAH3-11-e027451-s001.pdf [file JAH3-11-e027451-s001.pdf]

# **SUPPLEMENTAL MATERIAL**

**Table S1. Sensitivity Analysis: Herpes Zoster and Long-term Risk of Myocardial Infarction\* and Total CHD† in the Nurses' Health Study, the Nurses' Health Study II, and the Health Professionals Follow-up Study.**

| CHD Outcome                         | Years Since Herpes Zoster |                   |                   |
|-------------------------------------|---------------------------|-------------------|-------------------|
|                                     | Never                     | 1-4 years         | ≥5 years          |
| <b>NHS</b>                          |                           |                   |                   |
| <b>MI*</b>                          |                           |                   |                   |
| Cases/person-years                  | 886/820954                | 47/32917          | 66/42604          |
| Multivariable-adjusted‡ HR (95% CI) | 1.00 (ref)                | 1.22 (0.91, 1.64) | 1.12 (0.87, 1.45) |
| <b>Total CHD†</b>                   |                           |                   |                   |
| Cases/person-years                  | 4419/825984               | 229/ 33176        | 262/42880         |
| Multivariable-adjusted‡ HR (95% CI) | 1.00 (ref)                | 1.18 (1.04, 1.35) | 1.18 (1.04, 1.34) |
| <b>NHS2</b>                         |                           |                   |                   |
| <b>MI*</b>                          |                           |                   |                   |
| Cases/person-years                  | 238/1144385               | 8/27973           | 14/55238          |
| Multivariable-adjusted‡ HR (95% CI) | 1.00 (ref)                | 1.14 (0.56, 2.32) | 0.97 (0.56, 1.67) |
| <b>Total CHD†</b>                   |                           |                   |                   |
| Cases/person-years                  | 1072/1145251              | 34/28003          | 77/55314          |
| Multivariable-adjusted‡ HR (95% CI) | 1.00 (ref)                | 1.04 (0.74, 1.46) | 1.15 (0.91, 1.45) |
| <b>HPFS</b>                         |                           |                   |                   |
| <b>MI*</b>                          |                           |                   |                   |
| Cases/person-years                  | 460/200811                | 14/4275           | 53/12350          |
| Multivariable-adjusted‡ HR (95% CI) | 1.00 (ref)                | 1.20 (0.70, 2.06) | 1.36 (1.02, 1.81) |
| <b>Total CHD†</b>                   |                           |                   |                   |
| Cases/person-years                  | 2301/202673               | 57/4320           | 169/12464         |
| Multivariable-adjusted‡ HR (95% CI) | 1.00 (ref)                | 1.01 (0.78, 1.32) | 1.10 (0.94, 1.29) |

\*MI (myocardial infarction) outcome includes fatal and non-fatal myocardial infarction and fatal coronary heart disease. Individuals with coronary revascularization procedure (coronary artery bypass graft or percutaneous transluminal coronary angioplasty) were censored during follow-up.

†Total CHD includes fatal and non-fatal myocardial infarction, fatal coronary heart disease and coronary revascularization procedure (coronary artery bypass graft or percutaneous transluminal coronary angioplasty).

‡ Multivariable model adjusted for age, race, family history of heart disease (yes/no), smoking history, body mass index (BMI), waist circumference (≤70, 71-79,80-88, >88 cm), physical activity, diabetes mellitus, hypertension, elevated cholesterol, regular use (2+ days/week) of aspirin, thiazide diuretics, loop diuretics, "Statins" or other cholesterol-lowering drugs, calcium-channel blockers, beta blockers, angiotensin-converting-enzyme inhibitors, or "other" anti-hypertensive drugs, AHEI-2010 Score, menopausal status (in NHS and NHS II), oral contraceptive use (NHS II), post-menopausal hormonal therapy use (in NHS and NHS II), history of coronary heart disease (CHD), and a report of one or more of the following: cancer (other than non-melanoma skin cancer), rheumatoid arthritis (RA), Crohn's disease/ulcerative colitis (inflammatory bowel disease), systemic lupus erythematosus (SLE), asthma, diabetes, chronic obstructive pulmonary disease (COPD), oral steroids/corticosteroid use. NHS: Nurses' Health Study NHS II: Nurses' Health Study II HPFS: Health Professionals Follow-up Study HR: hazard ratio CI: confidence interval

NHS: Nurses' Health Study

NHS II: Nurses' Health Study II

HPFS: Health Professionals Follow-up Study

HR: Hazard Ratio

CI: Confidence Interval

**Table S2. Herpes Zoster and Long-term Risk of Stroke in the Nurses' Health Study, the Nurses' Health Study II, and the Health Professionals Follow-up Study, Stratified by Potentially Immunocompromising Conditions\*.**

| Stroke<br>Immunocompromising<br>Conditions (Yes/No) | Years Since Herpes Zoster |                   |                   |
|-----------------------------------------------------|---------------------------|-------------------|-------------------|
|                                                     | Never                     | 1-4 years         | ≥5 years          |
| <b>NHS</b>                                          |                           |                   |                   |
| <b>Yes</b>                                          |                           |                   |                   |
| Cases/Person-years                                  | 1076/362841               | 51/17146          | 114/24395         |
| MVHR <sup>†</sup> (95% CI)                          | 1.00 (ref)                | 0.95 (0.72, 1.26) | 1.37 (1.12, 1.67) |
| <b>No</b>                                           |                           |                   |                   |
| Cases/Person-years                                  | 1105/ 516980              | 44/ 18783         | 71 / 22216        |
| MVHR <sup>†</sup> (95% CI)                          | 1.00 (ref)                | 0.98 (0.73, 1.33) | 1.17 (0.91, 1.49) |
| p-interaction                                       | 0.45                      |                   |                   |
| <b>NHS II</b>                                       |                           |                   |                   |
| <b>Yes</b>                                          |                           |                   |                   |
| Cases/Person-years                                  | 192/824368                | 8/17644           | 15/32998          |
| MVHR <sup>†</sup> (95% CI)                          | 1.00 (ref)                | 1.28 (0.66, 2.51) | 2.09 (1.44, 3.04) |
| <b>No</b>                                           |                           |                   |                   |
| Cases/Person-years                                  | 280/824544                | 12/17724          | 25/32861          |
| MVHR <sup>†</sup> (95% CI)                          | 1.00 (ref)                | 1.11 (0.55, 2.25) | 1.03 (0.61, 1.73) |
| p-interaction                                       | 0.05                      |                   |                   |
| <b>HPFS</b>                                         |                           |                   |                   |
| <b>Yes</b>                                          |                           |                   |                   |
| Cases/Person-years                                  | 260/98370                 | 8/2456            | 21/7724           |
| MVHR <sup>†</sup> (95% CI)                          | 1.00 (ref)                | 0.99 (0.49, 2.01) | 0.97 (0.62, 1.52) |
| <b>No</b>                                           |                           |                   |                   |
| Cases/Person-years                                  | 281/153515                | 13/3121           | 22/8672           |
| MVHR <sup>†</sup> (95% CI)                          | 1.00 (ref)                | 1.79 (1.02, 3.16) | 1.19 (0.77, 1.85) |
| p-interaction                                       | 0.68                      |                   |                   |

\*Potentially immunocompromising conditions and treatments included a report of one or more of the following: cancer (other than non-melanoma skin cancer), rheumatoid arthritis (RA), Crohn's disease/ulcerative colitis (inflammatory bowel disease), systemic lupus erythematosus (SLE), asthma, diabetes, chronic obstructive pulmonary disease (COPD), oral steroids/corticosteroid use.

<sup>†</sup>Multivariable model adjusted for age, race, family history of heart disease (yes/no), smoking history, body mass index (BMI), waist circumference (≤70, 71-79, 80-88, >88 cm), physical activity, diabetes mellitus, hypertension, elevated cholesterol, regular use (2+ days/week) of aspirin, thiazide diuretics, loop diuretics, "Statins" or other cholesterol-lowering drugs, calcium-channel blockers, beta blockers, angiotensin-converting-enzyme inhibitors, or "other" anti-hypertensive drugs, AHEI-2010 Score, menopausal status (in NHS and NHS II), oral contraceptive use (NHS II), post-menopausal hormonal therapy use (in NHS and NHS II), and history of coronary heart disease.

NHS: Nurses' Health Study  
 NHS II: Nurses' Health Study II  
 HPFS: Health Professionals Follow-up Study  
 MVHR: Multivariable-adjusted Hazard Ratio  
 CI: Confidence Interval

**Table S3. Herpes Zoster and Long-term Risk of CHD in the Nurses' Health Study, the Nurses' Health Study II, and the Health Professionals Follow-up Study, Stratified by Potentially Immunocompromising Conditions.\***

| CHD<br>Immunocompromising<br>Conditions (Yes/No) | Years Since Herpes Zoster |                   |                   |
|--------------------------------------------------|---------------------------|-------------------|-------------------|
|                                                  | Never                     | 1-4 years         | ≥5 years          |
| <b>NHS</b>                                       |                           |                   |                   |
| <b>Yes</b>                                       |                           |                   |                   |
| Cases/Person-years                               | 2146/335777               | 113/15636         | 147/22073         |
| MVHR <sup>†</sup> (95% CI)                       | 1.00 (ref)                | 1.08 (0.89, 1.31) | 1.13 (0.95, 1.34) |
| <b>No</b>                                        |                           |                   |                   |
| Cases/Person-years                               | 2273/ 490208              | 116/17540         | 115/20807         |
| MVHR <sup>†</sup> (95% CI)                       | 1.00 (ref)                | 1.29 (1.07, 1.55) | 1.24 (1.02, 1.50) |
| p-interaction                                    | 0.20                      |                   |                   |
| <b>NHS II</b>                                    |                           |                   |                   |
| <b>Yes</b>                                       |                           |                   |                   |
| Cases/Person-years                               | 431/328608                | 15/10545          | 52/22782          |
| MVHR <sup>†</sup> (95% CI)                       | 1.00 (ref)                | 0.94 (0.56, 1.58) | 1.48 (1.11, 1.98) |
| <b>No</b>                                        |                           |                   |                   |
| Cases/Person-years                               | 641/816644                | 19/17458          | 25/32532          |
| MVHR <sup>†</sup> (95% CI)                       | 1.00 (ref)                | 1.15 (0.73, 1.82) | 0.79 (0.53, 1.18) |
| p-interaction                                    | 0.03                      |                   |                   |
| <b>HPFS</b>                                      |                           |                   |                   |
| <b>Yes</b>                                       |                           |                   |                   |
| Cases/Person-years                               | 988/75766                 | 23/1822           | 83/5777           |
| MVHR <sup>†</sup> (95% CI)                       | 1.00 (ref)                | 0.86 (0.56, 1.30) | 1.07 (0.85, 1.34) |
| <b>No</b>                                        |                           |                   |                   |
| Cases/Person-years                               | 1313/126907               | 34/2498           | 86/6687           |
| MVHR <sup>†</sup> (95% CI)                       | 1.00 (ref)                | 1.14 (0.81, 1.61) | 1.13 (0.90, 1.40) |
| p-interaction                                    | 0.49                      |                   |                   |

\*Potentially immunocompromising conditions and treatments included a report of one or more of the following: cancer (other than non-melanoma skin cancer), rheumatoid arthritis (RA), Crohn's disease/ulcerative colitis (inflammatory bowel disease), systemic lupus erythematosus (SLE), asthma, diabetes, chronic obstructive pulmonary disease (COPD), oral steroids/corticosteroid use.

<sup>†</sup>Multivariable model adjusted for age, race, family history of heart disease (yes/no), smoking history, body mass index (BMI), waist circumference (≤70, 71-79, 80-88, >88 cm), physical activity, diabetes mellitus, hypertension, elevated cholesterol, regular use (2+ days/week) of aspirin, thiazide diuretics, loop diuretics, "Statins" or other cholesterol-lowering drugs, calcium-channel blockers, beta blockers, angiotensin-converting-enzyme inhibitors, or "other" anti-hypertensive drugs, AHEI-2010 Score, menopausal status (in NHS and NHS II), oral contraceptive use (NHS II), post-menopausal hormonal therapy use (in NHS and NHS II), and history of stroke.

CHD: Coronary heart disease, defined as fatal or non-fatal myocardial infarction, fatal CHD, or coronary revascularization procedure (coronary artery bypass graft or percutaneous transluminal coronary angioplasty)

NHS: Nurses' Health Study

NHS II: Nurses' Health Study II

HPFS: Health Professionals Follow-up Study

MVHR: Multivariable-adjusted Hazard Ratio

CI: Confidence Interval

**Table S4. Herpes Zoster and Long-term Risk of Cardiovascular Disease (Composite)\* in the Nurses' Health Study, the Nurses' Health Study II, and the Health Professionals Follow-up Study, Stratified by Potentially Immunocompromising Conditions†**

| CVD*                                          | Years Since Herpes Zoster |                   |                   |
|-----------------------------------------------|---------------------------|-------------------|-------------------|
|                                               | Never                     | 1-4 years         | ≥5 years          |
| <b>Immunocompromising Conditions (Yes/No)</b> |                           |                   |                   |
| <b>NHS</b>                                    |                           |                   |                   |
| <b>Yes</b>                                    |                           |                   |                   |
| Cases/Person-years                            | 2866/323356               | 146/15095         | 227/20983         |
| MVHR‡ (95% CI)                                | 1.00 (ref)                | 1.04 (0.88, 1.23) | 1.23 (1.07, 1.41) |
| <b>No</b>                                     |                           |                   |                   |
| Cases/Person-years                            | 3094/477455               | 141/17005         | 173/19952         |
| MVHR‡ (95% CI)                                | 1.00 (ref)                | 1.16 (0.98, 1.37) | 1.27 (1.09, 1.49) |
| p-interaction                                 | 0.41                      |                   |                   |
| <b>NHS II</b>                                 |                           |                   |                   |
| <b>Yes</b>                                    |                           |                   |                   |
| Cases/Person-years                            | 607/322700                | 24/10313          | 78/22164          |
| MVHR‡ (95% CI)                                | 1.00 (ref)                | 1.09 (0.72, 1.64) | 1.60 (1.26, 2.03) |
| <b>No</b>                                     |                           |                   |                   |
| Cases/Person-years                            | 890/808644                | 28/17225          | 41/31988          |
| MVHR‡ (95% CI)                                | 1.00 (ref)                | 1.24 (0.85, 1.82) | 0.93 (0.68, 1.28) |
| p-interaction                                 | 0.02                      |                   |                   |
| <b>HPFS</b>                                   |                           |                   |                   |
| <b>Yes</b>                                    |                           |                   |                   |
| Cases/Person-years                            | 1080/73955                | 28/1766           | 90/5626           |
| MVHR‡ (95% CI)                                | 1.00 (ref)                | 0.94 (0.64, 1.37) | 1.07 (0.86, 1.33) |
| <b>No</b>                                     |                           |                   |                   |
| Cases/Person-years                            | 1432/124836               | 42/2446           | 97/6496           |
| MVHR‡ (95% CI)                                | 1.00 (ref)                | 1.30 (0.95, 1.77) | 1.17 (0.95, 1.45) |
| p-interaction                                 | 0.28                      |                   |                   |

\*Cardiovascular disease (CVD) is a composite of total stroke and coronary heart disease (CHD), defined as non-fatal or fatal myocardial infarction, fatal CHD, or coronary revascularization procedure

†Potentially immunocompromising conditions and treatments included a report of one or more of the following: cancer (other than non-melanoma skin cancer), rheumatoid arthritis (RA), Crohn's disease/ulcerative colitis (inflammatory bowel disease), systemic lupus erythematosus (SLE), asthma, diabetes, chronic obstructive pulmonary disease (COPD), oral steroids/corticosteroid use.

‡Multivariable model adjusted for age, race, family history of heart disease (yes/no), smoking history, body mass index (BMI), waist circumference (≤70, 71-79, 80-88, >88 cm), physical activity, diabetes mellitus, hypertension, elevated cholesterol, regular use (2+ days/week) of aspirin, thiazide diuretics, loop diuretics, "Statins" or other cholesterol-lowering drugs, calcium-channel blockers, beta blockers, angiotensin-converting-enzyme inhibitors, or "other" anti-hypertensive drugs, AHEI-2010 Score, menopausal status (in NHS and NHS II), oral contraceptive use (NHS II), post-menopausal hormonal therapy use (in NHS and NHS II), and history of stroke.

CHD: Coronary heart disease, defined as fatal/non-fatal myocardial infarction, fatal CHD, or coronary revascularization procedure (coronary artery bypass graft, percutaneous transluminal coronary angioplasty)

NHS: Nurses' Health Study

NHS II: Nurses' Health Study II

HPFS: Health Professionals Follow-up Study

MVHR: Multivariable-adjusted Hazard Ratio

CI: Confidence Interval
